# Supplementary material for: Whose emotion is it? Measuring self-other discrimination in romantic relationships during an emotional evaluation paradigm
Source: PubMed Central journal article supplement (PMC6155531; doi:10.1371/journal.pone.0204106), 2018-09-25

a)

## Male Participants

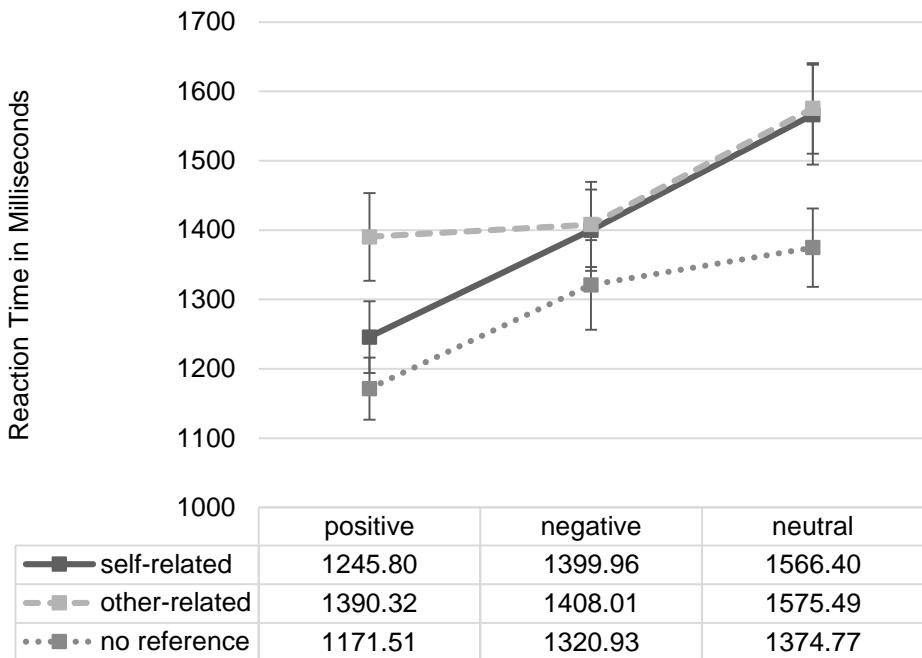

b)

## Female Participants

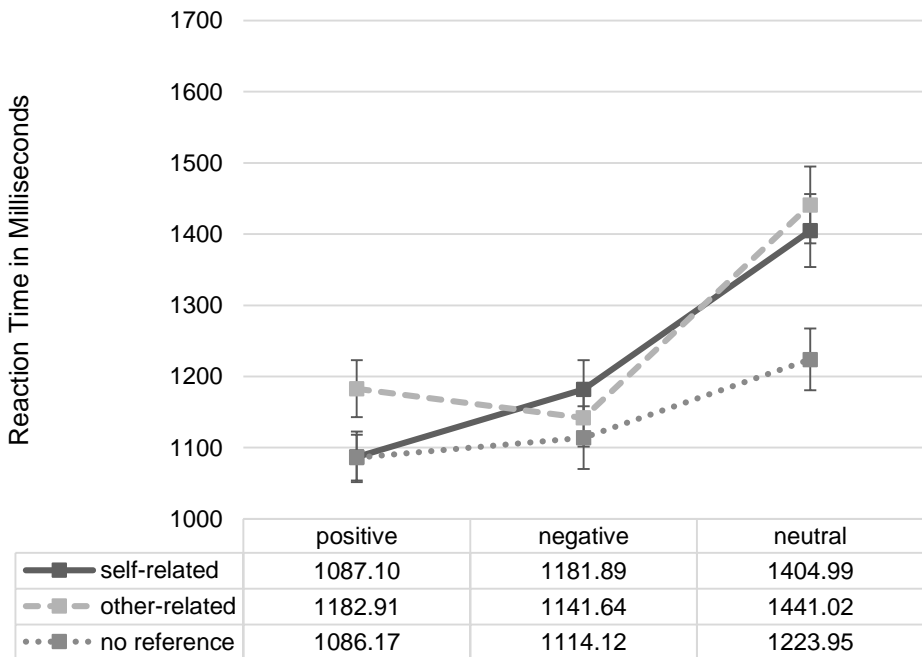

Supplement: pone.0204106.s002.pdf [file pone.0204106.s002.pdf]
