# Supplementary material for: Whose emotion is it? Measuring self-other discrimination in romantic relationships during an emotional evaluation paradigm
Source: PubMed Central journal article supplement (PMC6155531; doi:10.1371/journal.pone.0204106), 2018-09-25
Supplement: pone.0204106.s003.pdf [file pone.0204106.s003.pdf]

**S1 Table. Valence-Congruent Answers: Paired Samples t-Test Results for Differences between Selected Stimulus Categories for Male and Female Participants.**

| Pair                                  | <i>M</i> | <i>SD</i> | <i>t</i> |     | 95% CI      |             |
|---------------------------------------|----------|-----------|----------|-----|-------------|-------------|
|                                       |          |           |          |     | Lower Bound | Upper Bound |
| Male Participants <sup>a</sup>        |          |           |          |     |             |             |
| self-positive - other-positive        | 3.29     | 4.72      | 4.98     | *** | 1.97        | 4.62        |
| self-positive - self-negative         | 1.10     | 3.78      | 2.07     | *   | 0.03        | 2.16        |
| self-positive - self-neutral          | 7.16     | 7.25      | 7.05     | *** | 5.12        | 9.19        |
| self-positive - unreferenced-positive | 0.57     | 1.90      | 2.14     | *   | 0.03        | 1.10        |
| Female Participants <sup>b</sup>      |          |           |          |     |             |             |
| self-positive - other-positive        | 1.33     | 3.40      | 3.80     | *** | 0.63        | 2.03        |
| self-positive - self-negative         | -0.88    | 4.24      | -2.02    | *   | -1.75       | -0.01       |
| self-positive - self-neutral          | 8.06     | 6.17      | 12.67    | *** | 6.80        | 9.33        |
| self-positive - unreferenced-positive | 0.98     | 2.11      | 4.49     | *** | 0.55        | 1.41        |

<sup>a</sup>df = 50

<sup>b</sup>df = 93

\* $p \leq .05$

\*\* $p \leq .01$

\*\*\* $p \leq .001$
